# Supplementary material
Source: Royal Society of Chemistry journal article supplement (doi:10.1039/d6ja00048g)
Supplement: d6ja00048g1.pdf [file d6ja00048g1.pdf]

## Support Information

### **Enhancing LIBS Analysis of Heavy Metals in Fly Ash: A Hybrid Strategy Integrating Data Augmentation with Selective Ensemble**

Chunhua Yan<sup>a,\*</sup>, Haiting Zhang<sup>a</sup>, Xuedong Chen<sup>a</sup>, Maogang Li<sup>a</sup>, Tianlong Zhang<sup>b</sup>, Hua Li<sup>a,b,\*</sup>

<sup>a</sup> *College of Chemistry and Chemical Engineering, Xi'an Shiyou University, Xi'an, 710065, China*

<sup>b</sup> *College of Chemistry & Materials Science, Northwest University, Xi'an, 710069, China*

\* Corresponding author: Chunhua Yan, E-mail: huahua18254@163.com; Hua Li, E-mail: huali@nwu.edu.cn

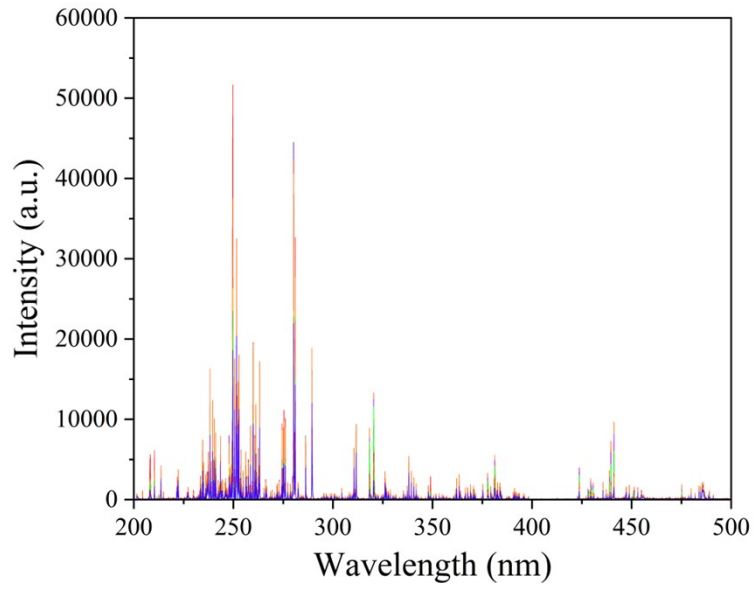

**Fig. S1** LIBS spectrum of all samples fly ash

**Fig. S2** Optimization results for SMOTE hyperparameters: (a) Number of nearest neighbors ( $k$ ), (b) Oversampling ratio

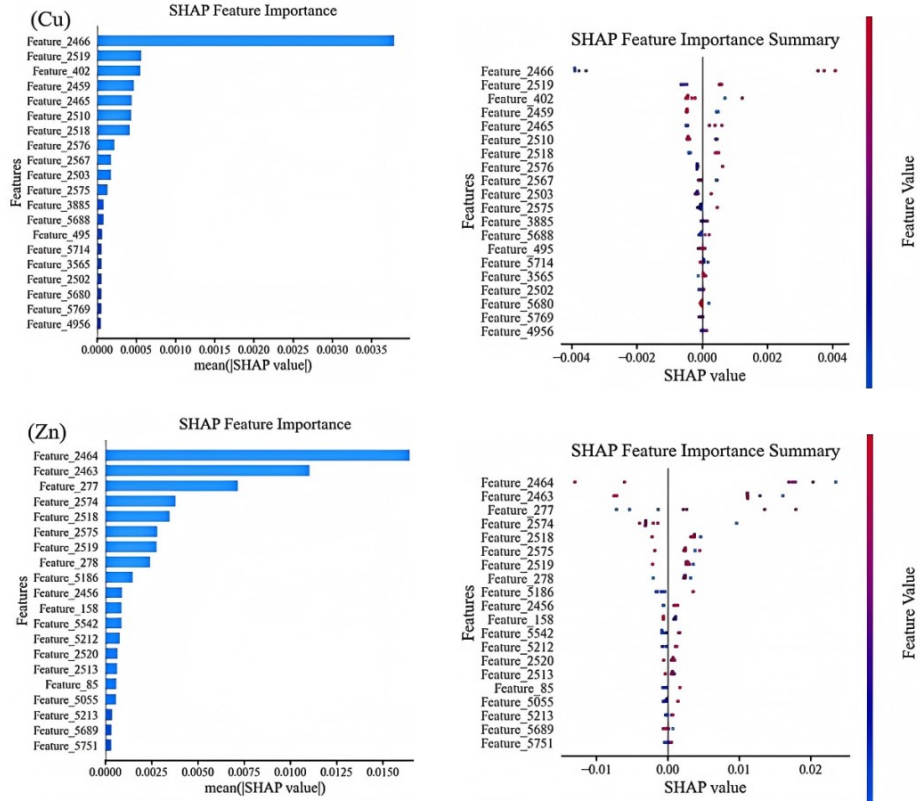

**Fig. S3** SHAP analysis of the WOA-SE model for (a) Cu and (b) Zn

Note:

| Cu         |                 | Zn         |                 |
|------------|-----------------|------------|-----------------|
| Feature_ID | Wavelength (nm) | Feature ID | Wavelength (nm) |
| 2466       | 327.87          | 2464       | 327.77          |
| 2519       | 330.62          | 2463       | 327.71          |
| 402        | 220.8           | 277        | 214.31          |
| 2459       | 327.51          | 2574       | 333.47          |
| 2465       | 327.82          | 2518       | 330.57          |
| 2510       | 330.15          | 2575       | 333.52          |
| 2518       | 330.57          | 2519       | 330.62          |
| 2576       | 333.58          | 278        | 214.36          |
| 2567       | 333.11          | 5186       | 468.97          |
| 2503       | 329.79          | 2456       | 327.35          |
| 2575       | 333.52          | 158        | 208.14          |
| 3835       | 401.48          | 5542       | 487.44          |
| 5638       | 495.01          | 5212       | 470.36          |
| 495        | 225.62          | 2520       | 330.67          |
| 5714       | 496.36          | 2513       | 330.31          |
| 3565       | 384.88          | 85         | 204.35          |
| 2502       | 329.74          | 5055       | 462.18          |
| 5680       | 494.6           | 5213       | 470.37          |
| 5769       | 499.22          | 5689       | 495.07          |

**Fig. S4** Residual distribution of the training and test sets for (a) Cu and (b) Zn

**Table S1** Hyperparameter settings and predictive performance for each individual model

| Model | Element | Hyperparameter                                                                   | 5-fold CV  |                          |
|-------|---------|----------------------------------------------------------------------------------|------------|--------------------------|
|       |         |                                                                                  | $R_{CV}^2$ | RMSE <sub>CV</sub> (wt%) |
| RF    | Cu      | n_estimators=568,<br>max_depth=34,<br>min_samples_split=6,<br>min_samples_leaf=1 | 0.9320     | 0.0017                   |

|      |    |                                                                                         |        |        |
|------|----|-----------------------------------------------------------------------------------------|--------|--------|
|      | Zn | n_estimators=987,<br>max_depth=18,<br>min_samples_split=2,<br>min_samples_leaf=1        | 0.9272 | 0.0119 |
|      | Cu | n_estimators=215,<br>learning_rate=0.164,<br>subsample=0.915                            | 0.9426 | 0.0017 |
| GBDT | Zn | n_estimators=458,<br>learning_rate=0.134,<br>subsample=0.9                              | 0.9216 | 0.0132 |
|      | Cu | C=9.8976, epsilon<br>=0.001, gamma='scale'                                              | 0.9101 | 0.0018 |
| SVR  | Zn | C=0.1, epsilon=0.001,<br>svrgamma='scale'                                               | 0.9065 | 0.0151 |
|      | Cu | n_neighbors=7,<br>leaf_size=10, p=1                                                     | 0.8729 | 0.0026 |
| KNN  | Zn | n_neighbors=5,<br>leaf_size=10, p=1                                                     | 0.8201 | 0.0246 |
|      | Cu | 'min_samples_leaf'=1,<br>'min_samples_split'=10,<br>'min_weight_fraction_lea<br>f'=0.1, | 0.9282 | 0.0019 |
| DT   | Zn | 'min_samples_leaf'=2,<br>'min_samples_split'=5,<br>'min_weight_fraction_lea<br>f'=0.1,  | 0.9149 | 0.0136 |
|      | Cu | —                                                                                       | 0.9149 | 0.0020 |
| LR   | Zn | —                                                                                       | 0.9310 | 0.0120 |

**Table S2** The predicted values of Cu for different models

| Reference<br>values (wt%) | Predicted values (wt%) |         |         |        |         |          |         |
|---------------------------|------------------------|---------|---------|--------|---------|----------|---------|
|                           | RF                     | GBDT    | SVR     | LR     | DT      | KNN      | WOA-SE  |
| 0.00824                   | 0.00784                | 0.00884 | 0.0079  | 0.0091 | 0.00928 | 0.00958  | 0.00943 |
| 0.0104                    | 0.0088                 | 0.0098  | 0.01319 | 0.0138 | 0.009   | 0.008999 | 0.00984 |
| 0.0244                    | 0.0258                 | 0.02676 | 0.0252  | 0.0265 | 0.02237 | 0.02137  | 0.02580 |
| 0.0116                    | 0.0085                 | 0.00986 | 0.00898 | 0.0101 | 0.00919 | 0.00919  | 0.01013 |

|         |         |          |         |         |         |         |         |
|---------|---------|----------|---------|---------|---------|---------|---------|
| 0.02192 | 0.02164 | 0.021676 | 0.02558 | 0.02118 | 0.02434 | 0.02434 | 0.02144 |
| 0.0192  | 0.02167 | 0.020698 | 0.0159  | 0.0196  | 0.01647 | 0.01647 | 0.01857 |
| 0.00584 | 0.00859 | 0.00896  | 0.0075  | 0.0088  | 0.00917 | 0.00917 | 0.00805 |

**Table S3** The predicted values of Zn for different models

| Reference<br>(wt%) | Predicted content(wt%) |         |         |         |          |         |         |
|--------------------|------------------------|---------|---------|---------|----------|---------|---------|
|                    | RF                     | GBDT    | SVR     | LR      | DT       | KNN     | WOA-SE  |
| 0.1986             | 0.1806                 | 0.16656 | 0.1606  | 0.1606  | 0.185225 | 0.1606  | 0.17168 |
| 0.1249             | 0.1223                 | 0.1204  | 0.1213  | 0.1213  | 0.15595  | 0.1513  | 0.11276 |
| 0.1021             | 0.10543                | 0.10134 | 0.10643 | 0.10643 | 0.106024 | 0.11643 | 0.10556 |
| 0.1132             | 0.12524                | 0.11155 | 0.12724 | 0.12724 | 0.117195 | 0.12724 | 0.12096 |
| 0.0991             | 0.11331                | 0.1271  | 0.10331 | 0.11331 | 0.117195 | 0.10331 | 0.10872 |
| 0.0484             | 0.04216                | 0.0566  | 0.04116 | 0.04216 | 0.049652 | 0.05116 | 0.05150 |
| 0.033              | 0.06734                | 0.05839 | 0.06334 | 0.06734 | 0.077431 | 0.08734 | 0.04945 |

**Table S4** Performance comparison of different data augmentation methods

| Element | Method         | $R_{CV}^2$ | $RMSE_{CV}$<br>(wt%) | $R_p^2$ | $RMSE_p$<br>(wt%) | $MRE_p(\%)$ |
|---------|----------------|------------|----------------------|---------|-------------------|-------------|
| Cu      | None           | 0.1918     | 0.0065               | 0.1732  | 0.0072            | 28.6        |
|         | Duplication    | 0.4523     | 0.0051               | 0.4315  | 0.0056            | 24.3        |
|         | Noise addition | 0.6237     | 0.0042               | 0.6018  | 0.0046            | 20.5        |
|         | GAN            | 0.7625     | 0.0034               | 0.7456  | 0.0037            | 16.8        |
|         | VAE            | 0.7246     | 0.0037               | 0.7023  | 0.0041            | 18.2        |
|         | SMOTE          | 0.8481     | 0.0029               | 0.8413  | 0.0032            | 14.2        |
| Zn      | None           | 0.2833     | 0.0355               | 0.2612  | 0.0386            | 22.7        |
|         | Duplication    | 0.4386     | 0.0328               | 0.4125  | 0.0357            | 19.6        |
|         | Noise addition | 0.5521     | 0.0312               | 0.5823  | 0.0338            | 17.4        |
|         | GAN            | 0.6102     | 0.0298               | 0.5864  | 0.0321            | 14.8        |
|         | VAE            | 0.5834     | 0.0307               | 0.5592  | 0.0332            | 15.9        |
|         | SMOTE          | 0.6834     | 0.0273               | 0.6751  | 0.0293            | 12.6        |

**Table S5** Performance comparison of different optimization algorithms

| Element | Models | $R_{CV}^2$ | $RMSE_{CV}$<br>(wt%) | $R_p^2$ | $RMSE_p$<br>(wt%) | $MRE_p(\%)$ |
|---------|--------|------------|----------------------|---------|-------------------|-------------|
| Cu      | PSO-SE | 0.9432     | 0.0017               | 0.8697  | 0.0024            | 21.51       |
|         | GA-SE  | 0.9462     | 0.0017               | 0.9107  | 0.0020            | 17.92       |
|         | WOA-SE | 0.9529     | 0.0016               | 0.9639  | 0.0013            | 11.65       |

|    |        |        |        |        |        |       |
|----|--------|--------|--------|--------|--------|-------|
|    | PSO-SE | 0.9409 | 0.0116 | 0.8792 | 0.0148 | 14.38 |
| Zn | GA-SE  | 0.9376 | 0.0109 | 0.9178 | 0.0122 | 11.85 |
|    | WOA-SE | 0.9460 | 0.0109 | 0.9614 | 0.0099 | 9.62  |

**Table S6** Performance comparison of different ensemble mechanisms

| Element | Models                    | $R_{CV}^2$ | $RMSE_{CV}$<br>(wt%) | $R_p^2$ | $RMSE_P$<br>(wt%) | $MRE_P$ (%) |
|---------|---------------------------|------------|----------------------|---------|-------------------|-------------|
| Cu      | RF + GBDT                 | 0.9158     | 0.0020               | 0.9402  | 0.0016            | 13.58       |
|         | RF + GBDT + LR            | 0.9286     | 0.0018               | 0.9487  | 0.0015            | 12.84       |
|         | RF + GBDT + LR + SVR      | 0.9389     | 0.0017               | 0.9553  | 0.0014            | 12.17       |
|         | RF + GBDT + LR + SVR + DT | 0.9448     | 0.0016               | 0.9581  | 0.0014            | 11.92       |
|         | Equal weight ensemble     | 0.9221     | 0.0019               | 0.9305  | 0.0017            | 14.76       |
|         | WOA-SE                    | 0.9529     | 0.0016               | 0.9639  | 0.0013            | 11.65       |
| Zn      | RF + GBDT                 | 0.9132     | 0.0146               | 0.9217  | 0.0142            | 17.35       |
|         | RF + GBDT + LR            | 0.9245     | 0.0138               | 0.9304  | 0.0135            | 15.82       |
|         | RF + GBDT + LR + SVR      | 0.9368     | 0.0126               | 0.9412  | 0.0123            | 13.47       |
|         | RF + GBDT + LR + SVR + DT | 0.9439     | 0.0118               | 0.9486  | 0.0116            | 11.83       |
|         | Equal weight ensemble     | 0.9184     | 0.0143               | 0.9128  | 0.0148            | 18.29       |
|         | WOA-SE                    | 0.9460     | 0.0109               | 0.9614  | 0.0099            | 9.62        |

**Table S7** Performance comparison of different ensemble frameworks

| Element | Method   | $R_{CV}^2$ | $RMSE_{CV}$ (wt%) | $R_p^2$ | $RMSE_P$ (wt%) | $MRE_P$ (%) |
|---------|----------|------------|-------------------|---------|----------------|-------------|
| Cu      | Bagging  | 0.9104     | 0.0021            | 0.9466  | 0.0015         | 13.44       |
|         | Stacking | 0.9395     | 0.0017            | 0.8926  | 0.0022         | 19.70       |
|         | Boosting | 0.9257     | 0.0018            | 0.9137  | 0.0020         | 17.92       |
|         | WOA-SE   | 0.9529     | 0.0016            | 0.9639  | 0.0013         | 11.65       |
| Zn      | Bagging  | 0.9047     | 0.0141            | 0.8822  | 0.0146         | 14.19       |
|         | Stacking | 0.9420     | 0.0112            | 0.8690  | 0.0154         | 14.97       |
|         | Boosting | 0.9324     | 0.0110            | 0.8284  | 0.0176         | 17.11       |
|         | WOA-SE   | 0.9460     | 0.0109            | 0.9614  | 0.0099         | 9.62        |

**Table S8** Ablation study results evaluating the necessity of data augmentation, preprocessing, and feature selection

| Element | Method       | $R_{CV}^2$ | $RMSE_{CV}$<br>(wt%) | $R_p^2$ | $RMSE_P$<br>(wt%) | $MRE_P$ (%) |
|---------|--------------|------------|----------------------|---------|-------------------|-------------|
| Cu      | SMOTE        | 0.8481     | 0.0029               | 0.8260  | 0.0028            | 24.63       |
|         | D2nd         | 0.6042     | 0.0057               | 0.5930  | 0.0054            | 35.17       |
|         | CARS         | 0.6948     | 0.0046               | 0.6940  | 0.0046            | 29.69       |
|         | SMOTE + CARS | 0.9156     | 0.0021               | 0.8909  | 0.0022            | 20.50       |

|    |                     |        |        |        |        |       |
|----|---------------------|--------|--------|--------|--------|-------|
|    | SMOTE + D2nd        | 0.9037 | 0.0022 | 0.9060 | 0.0023 | 19.62 |
|    | D2nd + CARS         | 0.7989 | 0.0032 | 0.8710 | 0.0025 | 22.85 |
|    | SMOTE + D2nd + CARS | 0.9529 | 0.0016 | 0.9639 | 0.0013 | 11.65 |
|    | SMOTE               | 0.6834 | 0.0273 | 0.5721 | 0.0328 | 26.92 |
|    | D1st                | 0.5762 | 0.0304 | 0.5978 | 0.0294 | 24.68 |
|    | CARS                | 0.5431 | 0.0358 | 0.5229 | 0.0347 | 29.68 |
| Zn | SMOTE + CARS        | 0.8616 | 0.0177 | 0.7722 | 0.0239 | 18.74 |
|    | SMOTE + D1st        | 0.9033 | 0.0148 | 0.8895 | 0.0162 | 15.82 |
|    | D1st + CARS         | 0.9368 | 0.0126 | 0.9412 | 0.0123 | 13.47 |
|    | SMOTE + D1st + CARS | 0.9460 | 0.0109 | 0.9614 | 0.0099 | 9.62  |
